# Supplementary material for: Breaking the symmetry of interfacial molecules with push–pull substituents enables 19.67% efficiency organic solar cells featuring enhanced charge extraction
Source: Royal Society of Chemistry journal article supplement (doi:10.1039/d4ee04515g), 2024-12-17
Supplement: d4ee04515g1.xlsx [file d4ee04515g1.xlsx]

## Sheet: EQE
BrCz								BrDECz								DECz
AM1.5G	27.095			Measure Mode	AC-EQE			AM1.5G	28.205			Measure Mode	AC-EQE			AM1.5G	27.976			Measure Mode	AC-EQE
AM1.5D	24.179			AM 1.5G	27.095			AM1.5D	25.176			AM 1.5G	28.205			AM1.5D	24.969			AM 1.5G	27.976
AM 0	32.052			AM 1.5D	24.179			AM 0	33.36			AM 1.5D	25.176			AM 0	33.12			AM 1.5D	24.969
Lambda(nm)	EQE (%)	SR (A/W)	Jsc (mA/cm^2)	AM 0	32.052			Lambda(nm)	EQE (%)	SR (A/W)	Jsc (mA/cm^2)	AM 0	33.36			Lambda(nm)	EQE (%)	SR (A/W)	Jsc (mA/cm^2)	AM 0	33.12
300	0.039	0	0	WL-Range	300-1000nm			300	0.026	0	0	WL-Range	300-1000nm			300	0.039	0	0	WL-Range	300-1000nm
305	0.002	0	0	Voltage Bias	0			310	0.001	0	0	Voltage Bias	0			305	0.002	0	0	Voltage Bias	0
310	0.001	0	0	Date/Time	05-11_00-24-44			320	8.88	0.023	0.002	Date/Time	07-08_23-10-35			310	0.001	0	0	Date/Time	05-22_01-45-37
315	0.001	0	0	Spent Seconds	209			330	19.358	0.052	0.012	Spent Seconds	109			315	5.899	0.015	0	Spent Seconds	208
320	9.337	0.024	0.001					340	31.388	0.086	0.03					320	9.842	0.025	0.002
325	13.667	0.036	0.004					350	38.973	0.11	0.047					325	15.041	0.039	0.004
330	19.701	0.052	0.009					360	47.752	0.139	0.066					330	21.112	0.056	0.009
335	26.09	0.07	0.013					370	49.421	0.147	0.091					335	27.385	0.074	0.014
340	31.461	0.086	0.017					380	47.872	0.147	0.1					340	32.531	0.089	0.018
345	36.093	0.1	0.022					390	47.847	0.15	0.094					345	36.626	0.102	0.023
350	39.13	0.11	0.025					400	50.764	0.164	0.118					350	39.404	0.111	0.026
355	41.082	0.118	0.032					410	55.557	0.184	0.201					355	41.062	0.118	0.032
360	43.325	0.126	0.031					420	61.078	0.207	0.235					360	46.668	0.135	0.032
365	44.263	0.13	0.037					430	67.823	0.235	0.262					365	47.938	0.141	0.04
370	43.81	0.131	0.046					440	74.578	0.265	0.301					370	48.098	0.144	0.05
375	42.8	0.129	0.041					450	79.057	0.287	0.396					375	47.993	0.145	0.046
380	40.882	0.125	0.046					460	80.642	0.299	0.453					380	47.4	0.145	0.053
385	39.783	0.124	0.037					470	81.348	0.308	0.473					385	47.621	0.148	0.044
390	39.597	0.125	0.041					480	81.713	0.316	0.493					390	49.028	0.154	0.05
395	40.45	0.129	0.043					490	82.184	0.325	0.49					395	51.246	0.163	0.054
400	42.311	0.136	0.055					500	83.571	0.337	0.519					400	54.419	0.176	0.07
405	44.822	0.146	0.083					510	85.398	0.351	0.531					405	57.95	0.189	0.107
410	48.086	0.159	0.087					520	87.367	0.366	0.535					410	61.78	0.204	0.112
415	51.893	0.174	0.099					530	89.561	0.383	0.573					415	65.255	0.218	0.126
420	56.505	0.191	0.111					540	90.873	0.396	0.603					420	68.644	0.233	0.137
425	61.077	0.209	0.123					550	92.377	0.41	0.615					425	71.412	0.245	0.147
430	66.298	0.23	0.126					560	93.589	0.423	0.636					430	73.785	0.256	0.143
435	70.887	0.249	0.133					570	94.128	0.433	0.644					435	75.162	0.264	0.144
440	75.191	0.267	0.166					580	94.214	0.441	0.648					440	75.966	0.27	0.172
445	78.486	0.282	0.192					590	94.079	0.448	0.662					445	76.257	0.274	0.191
450	81.176	0.295	0.211					600	93.996	0.455	0.656					450	75.883	0.275	0.201
455	82.734	0.304	0.229					610	93.741	0.461	0.676					455	75.513	0.277	0.212
460	83.564	0.31	0.239					620	92.612	0.463	0.672					460	75.061	0.278	0.216
465	83.98	0.315	0.246					630	91.272	0.464	0.658					465	74.593	0.28	0.22
470	84.48	0.32	0.245					640	89.889	0.464	0.665					470	74.666	0.283	0.217
475	84.424	0.323	0.252					650	88.589	0.464	0.659					475	74.893	0.287	0.223
480	84.405	0.327	0.259					660	87.694	0.467	0.634					480	75.584	0.293	0.231
485	84.331	0.33	0.263					670	87.087	0.471	0.66					485	76.569	0.299	0.237
490	84.394	0.333	0.242					680	87.321	0.479	0.667					490	77.033	0.304	0.22
495	84.453	0.337	0.262					690	87.939	0.489	0.618					495	78.458	0.313	0.242
500	84.72	0.342	0.267					700	88.41	0.499	0.629					500	79.708	0.321	0.249
505	84.966	0.346	0.26					710	88.841	0.509	0.654					505	81.15	0.33	0.247
510	85.552	0.352	0.274					720	88.951	0.516	0.613					510	82.418	0.339	0.263
515	85.932	0.357	0.274					730	89.101	0.525	0.566					515	83.941	0.349	0.266
520	86.489	0.363	0.258					740	89.295	0.533	0.628					520	85.481	0.358	0.253
525	87.22	0.369	0.283					750	88.811	0.537	0.662					525	86.731	0.367	0.28
530	87.648	0.375	0.282					760	88.323	0.541	0.636					530	87.968	0.376	0.282
535	88.291	0.381	0.292					770	88.187	0.548	0.392					535	89.093	0.384	0.294
540	88.624	0.386	0.297					780	87.909	0.553	0.646					540	90.001	0.392	0.301
545	89.198	0.392	0.295					790	87.761	0.559	0.639					545	90.843	0.399	0.301
550	89.626	0.398	0.303					800	87.7	0.566	0.615					550	91.661	0.407	0.309
555	90.178	0.404	0.31					810	87.45	0.571	0.611					555	92.449	0.414	0.317
560	90.564	0.409	0.306					820	87.006	0.575	0.531					560	93.126	0.421	0.314
565	90.905	0.414	0.313					830	85.509	0.572	0.523					565	93.593	0.426	0.322
570	91.115	0.419	0.311					840	83.204	0.564	0.549					570	93.95	0.432	0.321
575	90.964	0.422	0.314					850	79.789	0.547	0.553					575	94.034	0.436	0.324
580	91.182	0.426	0.314					860	74.64	0.518	0.509					580	94.058	0.44	0.324
585	90.734	0.428	0.327					870	67.101	0.471	0.474					585	94.008	0.444	0.338
590	90.719	0.432	0.312					880	56.453	0.401	0.414					590	93.997	0.447	0.323
595	90.489	0.434	0.312					890	47.914	0.344	0.345					595	93.924	0.451	0.324
600	90.146	0.436	0.319					900	35.434	0.257	0.24					600	93.651	0.453	0.331
605	89.681	0.438	0.32					910	25.436	0.187	0.157					605	93.629	0.457	0.334
610	89.236	0.439	0.325					920	16.36	0.121	0.102					610	93.469	0.46	0.34
615	88.858	0.441	0.321					930	10.705	0.08	0.07					615	92.932	0.461	0.336
620	88.279	0.441	0.32					940	6.241	0.047	0.018					620	92.307	0.462	0.335
625	87.581	0.441	0.317					950	3.764	0.029	0.013					625	91.846	0.463	0.332
630	86.776	0.441	0.31					960	2.229	0.017	0.008					630	91.379	0.464	0.325
635	86.075	0.441	0.312					970	1.186	0.009	0.007					635	90.737	0.465	0.329
640	85.799	0.443	0.32					980	0.638	0.005	0.005					640	90.074	0.465	0.337
645	85.127	0.443	0.32					990	0.386	0.003	0.003					645	89.514	0.466	0.336
650	84.883	0.445	0.31					1000	0.225	0.002	0.002					650	88.982	0.466	0.325
655	84.551	0.447	0.314													655	88.43	0.467	0.328
660	84.507	0.45	0.295													660	88.094	0.469	0.308
665	84.47	0.453	0.315													665	87.643	0.47	0.327
670	84.733	0.458	0.324													670	87.303	0.472	0.335
675	85.009	0.463	0.324													675	87.26	0.475	0.333
680	85.058	0.466	0.326													680	86.953	0.477	0.334
685	85.18	0.471	0.325													685	86.629	0.479	0.331
690	85.194	0.474	0.276													690	86.578	0.482	0.28
695	85.101	0.477	0.297													695	86.591	0.485	0.302
700	84.948	0.48	0.311													700	86.603	0.489	0.317
705	84.868	0.483	0.309													705	86.608	0.492	0.315
710	84.68	0.485	0.317													710	86.752	0.497	0.324
715	84.507	0.487	0.316													715	86.671	0.5	0.324
720	84.239	0.489	0.266													720	86.65	0.503	0.273
725	84.121	0.492	0.272													725	86.708	0.507	0.28
730	83.845	0.494	0.263													730	86.835	0.511	0.272
735	83.752	0.496	0.289													735	86.9	0.515	0.299
740	83.327	0.497	0.3													740	86.911	0.519	0.313
745	83.383	0.501	0.307													745	87	0.523	0.321
750	83.119	0.503	0.312													750	86.955	0.526	0.326
755	82.835	0.504	0.311													755	86.623	0.527	0.325
760	82.763	0.507	0.284													760	86.513	0.53	0.297
765	82.713	0.51	0.114													765	86.213	0.532	0.119
770	82.386	0.512	0.253													770	86.309	0.536	0.265
775	82.167	0.514	0.301													775	86.113	0.538	0.315
780	82.102	0.516	0.302													780	85.908	0.54	0.317
785	82.083	0.52	0.301													785	85.782	0.543	0.314
790	82.086	0.523	0.296													790	86.101	0.549	0.31
795	82.076	0.526	0.287													795	85.929	0.551	0.301
800	81.974	0.529	0.288													800	86.168	0.556	0.302
805	81.821	0.531	0.285													805	86.041	0.559	0.3
810	81.903	0.535	0.287													810	85.909	0.561	0.301
815	81.666	0.537	0.266													815	85.814	0.564	0.28
820	81.454	0.539	0.231													820	85.539	0.566	0.242
825	81.143	0.54	0.241													825	85.173	0.567	0.253
830	80.834	0.541	0.251													830	84.819	0.568	0.263
835	80.122	0.54	0.252													835	84.002	0.566	0.265
840	79.23	0.537	0.269													840	82.917	0.562	0.281
845	77.949	0.531	0.268													845	81.426	0.555	0.28
850	76.027	0.521	0.26													850	79.795	0.547	0.272
855	74.075	0.511	0.241													855	77.153	0.532	0.252
860	71.281	0.494	0.246													860	74.79	0.519	0.257
865	68.11	0.475	0.239													865	71.588	0.499	0.251
870	64.228	0.451	0.215													870	67.967	0.477	0.226
875	59.882	0.423	0.208													875	63.919	0.451	0.221
880	53.76	0.382	0.19													880	58.425	0.415	0.205
885	48.618	0.347	0.169													885	53.7	0.383	0.185
890	45.057	0.323	0.155													890	50.651	0.364	0.172
895	38.103	0.275	0.133													895	43.943	0.317	0.151
900	32.538	0.236	0.089													900	38.448	0.279	0.104
905	26.963	0.197	0.077													905	32.818	0.24	0.093
910	22.893	0.168	0.064													910	28.524	0.209	0.079
915	18.357	0.135	0.05													915	23.334	0.172	0.062
920	14.568	0.108	0.041													920	18.949	0.141	0.052
925	12.375	0.092	0.037													925	16.379	0.122	0.048
930	9.496	0.071	0.026													930	12.72	0.095	0.035
935	7.328	0.055	0.009													935	9.898	0.075	0.013
940	5.572	0.042	0.006													940	7.587	0.058	0.008
945	4.378	0.033	0.007													945	5.956	0.045	0.009
950	3.394	0.026	0.005													950	4.64	0.036	0.006
955	2.575	0.02	0.004													955	3.534	0.027	0.006
960	2.016	0.016	0.003													960	2.761	0.021	0.004
965	1.454	0.011	0.003													965	2.049	0.016	0.004
970	1.061	0.008	0.003													970	1.453	0.011	0.004
975	0.78	0.006	0.002													975	1.079	0.008	0.003
980	0.562	0.004	0.002													980	0.767	0.006	0.002
985	0.459	0.004	0.001													985	0.638	0.005	0.002
990	0.323	0.003	0.001													990	0.461	0.004	0.002
995	0.239	0.002	0.001													995	0.33	0.003	0.001
1000	0.193	0.002	0.001													1000	0.265	0.002	0.001

## Sheet: JV
Y1 0.3.CH1		BrCz		T71 DECz 20% 1.CH1		DECz		Name	L16-IPH-1.CH1		BrDECz
								Note
2024-07-17 05:42:43				2024-07-18 06:33:10				Time Stamp	2024-09-22 19:42:30
11.08				11.29				Duration (s)	11.3
								[Parameter]
-0.1				-0.1				Start (V)	-0.1
1.1				1.1				End (V)	1.1
0.01				0.01				Step (V)	0.01
0.1				0.1				Area (cm^2)	0.1
1				1				SUN	1
1				1				NPLC	1
1				1				Compliance (A)	1
TRUE				TRUE				Sense mode	TRUE
0				0				degC	0
Volt (V)	I (mA)	J (mA/cm^2)		Volt (V)	I (mA)	J (mA/cm^2)		[Result]	Volt (V)	I (mA)	J (mA/cm^2)
-0.1	-2.8459	-28.459		-0.1	-2.86352	-28.6352		[Raw Data]	-0.1	-2.89401	-28.9401
-0.09	-2.8457	-28.457		-0.09	-2.86087	-28.6087			-0.09	-2.88775	-28.8775
-0.08	-2.84392	-28.4392		-0.08	-2.86278	-28.6278			-0.08	-2.88794	-28.8794
-0.07	-2.84326	-28.4326		-0.07	-2.86295	-28.6295			-0.07	-2.88901	-28.8901
-0.06	-2.8432	-28.432		-0.06	-2.86364	-28.6364			-0.06	-2.88804	-28.8804
-0.05	-2.84264	-28.4264		-0.05	-2.86395	-28.6395			-0.05	-2.88883	-28.8883
-0.04	-2.84208	-28.4208		-0.04	-2.86197	-28.6197			-0.04	-2.8875	-28.875
-0.03	-2.84206	-28.4206		-0.03	-2.86085	-28.6085			-0.03	-2.88694	-28.8694
-0.02	-2.84069	-28.4069		-0.02	-2.85933	-28.5933			-0.02	-2.88482	-28.8482
-0.01	-2.83968	-28.3968		-0.01	-2.85863	-28.5863			-0.01	-2.88459	-28.8459
0	-2.83907	-28.3907		0	-2.85947	-28.5947			0	-2.88519	-28.8519
0.01	-2.83746	-28.3746		0.01	-2.8595	-28.595			0.01	-2.88494	-28.8494
0.02	-2.83656	-28.3656		0.02	-2.85966	-28.5966			0.02	-2.88497	-28.8497
0.03	-2.83615	-28.3615		0.03	-2.85907	-28.5907			0.03	-2.88371	-28.8371
0.04	-2.8355	-28.355		0.04	-2.85699	-28.5699			0.04	-2.88344	-28.8344
0.05	-2.83503	-28.3503		0.05	-2.85634	-28.5634			0.05	-2.88081	-28.8081
0.06	-2.83422	-28.3422		0.06	-2.85456	-28.5456			0.06	-2.88127	-28.8127
0.07	-2.83379	-28.3379		0.07	-2.8534	-28.534			0.07	-2.87967	-28.7967
0.08	-2.83275	-28.3275		0.08	-2.85293	-28.5293			0.08	-2.87988	-28.7988
0.09	-2.83196	-28.3196		0.09	-2.85342	-28.5342			0.09	-2.8778	-28.778
0.1	-2.83246	-28.3246		0.1	-2.8535	-28.535			0.1	-2.87754	-28.7754
0.11	-2.83108	-28.3108		0.11	-2.85461	-28.5461			0.11	-2.87594	-28.7594
0.12	-2.83013	-28.3013		0.12	-2.85509	-28.5509			0.12	-2.87586	-28.7586
0.13	-2.82949	-28.2949		0.13	-2.85468	-28.5468			0.13	-2.87594	-28.7594
0.14	-2.82825	-28.2825		0.14	-2.85361	-28.5361			0.14	-2.87589	-28.7589
0.15	-2.82672	-28.2672		0.15	-2.85275	-28.5275			0.15	-2.87555	-28.7555
0.16	-2.82598	-28.2598		0.16	-2.85144	-28.5144			0.16	-2.87505	-28.7505
0.17	-2.82483	-28.2483		0.17	-2.85018	-28.5018			0.17	-2.87571	-28.7571
0.18	-2.82337	-28.2337		0.18	-2.85044	-28.5044			0.18	-2.87393	-28.7393
0.19	-2.82131	-28.2131		0.19	-2.84937	-28.4937			0.19	-2.87459	-28.7459
0.2	-2.82006	-28.2006		0.2	-2.84786	-28.4786			0.2	-2.87236	-28.7236
0.21	-2.81886	-28.1886		0.21	-2.84611	-28.4611			0.21	-2.87213	-28.7213
0.22	-2.81707	-28.1707		0.22	-2.84478	-28.4478			0.22	-2.8695	-28.695
0.23	-2.81676	-28.1676		0.23	-2.84328	-28.4328			0.23	-2.87013	-28.7013
0.24	-2.81526	-28.1526		0.24	-2.8421	-28.421			0.24	-2.86859	-28.6859
0.25	-2.81316	-28.1316		0.25	-2.8413	-28.413			0.25	-2.86949	-28.6949
0.26	-2.81326	-28.1326		0.26	-2.8401	-28.401			0.26	-2.8679	-28.679
0.27	-2.8117	-28.117		0.27	-2.83755	-28.3755			0.27	-2.86782	-28.6782
0.28	-2.81024	-28.1024		0.28	-2.8366	-28.366			0.28	-2.86511	-28.6511
0.29	-2.81092	-28.1092		0.29	-2.83564	-28.3564			0.29	-2.86472	-28.6472
0.3	-2.80972	-28.0972		0.3	-2.83505	-28.3505			0.3	-2.86314	-28.6314
0.31	-2.8073	-28.073		0.31	-2.8353	-28.353			0.31	-2.86295	-28.6295
0.32	-2.8076	-28.076		0.32	-2.8349	-28.349			0.32	-2.86249	-28.6249
0.33	-2.80649	-28.0649		0.33	-2.8336	-28.336			0.33	-2.86202	-28.6202
0.34	-2.80514	-28.0514		0.34	-2.83165	-28.3165			0.34	-2.86073	-28.6073
0.35	-2.80548	-28.0548		0.35	-2.83033	-28.3033			0.35	-2.85791	-28.5791
0.36	-2.80461	-28.0461		0.36	-2.82876	-28.2876			0.36	-2.85644	-28.5644
0.37	-2.80284	-28.0284		0.37	-2.82715	-28.2715			0.37	-2.85337	-28.5337
0.38	-2.80226	-28.0226		0.38	-2.82592	-28.2592			0.38	-2.85255	-28.5255
0.39	-2.80109	-28.0109		0.39	-2.82469	-28.2469			0.39	-2.85099	-28.5099
0.4	-2.79962	-27.9962		0.4	-2.82281	-28.2281			0.4	-2.85212	-28.5212
0.41	-2.79952	-27.9952		0.41	-2.82091	-28.2091			0.41	-2.85002	-28.5002
0.42	-2.79825	-27.9825		0.42	-2.82038	-28.2038			0.42	-2.85019	-28.5019
0.43	-2.7964	-27.964		0.43	-2.81881	-28.1881			0.43	-2.84789	-28.4789
0.44	-2.79583	-27.9583		0.44	-2.81734	-28.1734			0.44	-2.84722	-28.4722
0.45	-2.79429	-27.9429		0.45	-2.81576	-28.1576			0.45	-2.84428	-28.4428
0.46	-2.79257	-27.9257		0.46	-2.81368	-28.1368			0.46	-2.84441	-28.4441
0.47	-2.79222	-27.9222		0.47	-2.81138	-28.1138			0.47	-2.84251	-28.4251
0.48	-2.79064	-27.9064		0.48	-2.80947	-28.0947			0.48	-2.84102	-28.4102
0.49	-2.78865	-27.8865		0.49	-2.80729	-28.0729			0.49	-2.83918	-28.3918
0.5	-2.78782	-27.8782		0.5	-2.80498	-28.0498			0.5	-2.83789	-28.3789
0.51	-2.78523	-27.8523		0.51	-2.80263	-28.0263			0.51	-2.83524	-28.3524
0.52	-2.782	-27.82		0.52	-2.80103	-28.0103			0.52	-2.83354	-28.3354
0.53	-2.77974	-27.7974		0.53	-2.79932	-27.9932			0.53	-2.83215	-28.3215
0.54	-2.77547	-27.7547		0.54	-2.79831	-27.9831			0.54	-2.8302	-28.302
0.55	-2.7719	-27.719		0.55	-2.79684	-27.9684			0.55	-2.82844	-28.2844
0.56	-2.76994	-27.6994		0.56	-2.79377	-27.9377			0.56	-2.82602	-28.2602
0.57	-2.7669	-27.669		0.57	-2.78925	-27.8925			0.57	-2.82381	-28.2381
0.58	-2.76383	-27.6383		0.58	-2.78454	-27.8454			0.58	-2.81915	-28.1915
0.59	-2.76176	-27.6176		0.59	-2.78092	-27.8092			0.59	-2.81653	-28.1653
0.6	-2.75617	-27.5617		0.6	-2.77679	-27.7679			0.6	-2.81166	-28.1166
0.61	-2.75015	-27.5015		0.61	-2.77444	-27.7444			0.61	-2.80871	-28.0871
0.62	-2.74478	-27.4478		0.62	-2.77231	-27.7231			0.62	-2.80363	-28.0363
0.63	-2.7376	-27.376		0.63	-2.76689	-27.6689			0.63	-2.80088	-28.0088
0.64	-2.73003	-27.3003		0.64	-2.76029	-27.6029			0.64	-2.7954	-27.954
0.65	-2.72214	-27.2214		0.65	-2.75144	-27.5144			0.65	-2.79141	-27.9141
0.66	-2.71145	-27.1145		0.66	-2.74137	-27.4137			0.66	-2.78453	-27.8453
0.67	-2.69962	-26.9962		0.67	-2.72879	-27.2879			0.67	-2.77828	-27.7828
0.68	-2.68417	-26.8417		0.68	-2.71535	-27.1535			0.68	-2.76862	-27.6862
0.69	-2.66589	-26.6589		0.69	-2.69894	-26.9894			0.69	-2.75908	-27.5908
0.7	-2.64411	-26.4411		0.7	-2.67809	-26.7809			0.7	-2.74631	-27.4631
0.71	-2.61534	-26.1534		0.71	-2.65131	-26.5131			0.71	-2.73009	-27.3009
0.72	-2.57924	-25.7924		0.72	-2.61823	-26.1823			0.72	-2.71024	-27.1024
0.73	-2.53507	-25.3507		0.73	-2.57609	-25.7609			0.73	-2.6845	-26.845
0.74	-2.47797	-24.7797		0.74	-2.52192	-25.2192			0.74	-2.65154	-26.5154
0.75	-2.40793	-24.0793		0.75	-2.45504	-24.5504			0.75	-2.6083	-26.083
0.76	-2.32093	-23.2093		0.76	-2.36988	-23.6988			0.76	-2.55526	-25.5526
0.77	-2.21132	-22.1132		0.77	-2.26048	-22.6048			0.77	-2.48564	-24.8564
0.78	-2.07571	-20.7571		0.78	-2.12405	-21.2405			0.78	-2.39707	-23.9707
0.79	-1.9088	-19.088		0.79	-1.95214	-19.5214			0.79	-2.28437	-22.8437
0.8	-1.70623	-17.0623		0.8	-1.73876	-17.3876			0.8	-2.14259	-21.4259
0.81	-1.46561	-14.6561		0.81	-1.48131	-14.8131			0.81	-1.96416	-19.6416
0.82	-1.18431	-11.8431		0.82	-1.17366	-11.7366			0.82	-1.74573	-17.4573
0.83	-0.859594	-8.59594		0.83	-0.809901	-8.09901			0.83	-1.48103	-14.8103
0.84	-0.491425	-4.91425		0.84	-0.390303	-3.90303			0.84	-1.16574	-11.6574
0.85	-0.0801532	-0.801532		0.85	0.0891726	0.891726			0.85	-0.798117	-7.98117
0.86	0.373975	3.73975		0.86	0.627369	6.27369			0.86	-0.373395	-3.73395
0.87	0.869478	8.69478		0.87	1.22444	12.2444			0.87	0.106678	1.06678
0.88	1.40236	14.0236		0.88	1.87723	18.7723			0.88	0.642899	6.42899
0.89	1.97114	19.7114		0.89	2.58321	25.8321			0.89	1.23377	12.3377
0.9	2.57381	25.7381		0.9	3.33948	33.3948			0.9	1.87557	18.7557
0.91	3.20626	32.0626		0.91	4.14443	41.4443			0.91	2.56599	25.6599
0.92	3.86779	38.6779		0.92	4.99359	49.9359			0.92	3.30191	33.0191
0.93	4.55614	45.5614		0.93	5.88381	58.8381			0.93	4.07972	40.7972
0.94	5.26866	52.6866		0.94	6.81249	68.1249			0.94	4.89649	48.9649
0.95	6.00519	60.0519		0.95	7.77727	77.7727			0.95	5.74998	57.4998
0.96	6.76371	67.6371		0.96	8.77487	87.7487			0.96	6.63628	66.3628
0.97	7.54268	75.4268		0.97	9.80255	98.0255			0.97	7.55291	75.5291
0.98	8.34074	83.4074		0.98	10.8574	108.574			0.98	8.497	84.97
0.99	9.1581	91.581		0.99	11.9373	119.373			0.99	9.4685	94.685
1	9.99247	99.9247		1	13.041	130.41			1	10.463	104.63
1.01	10.844	108.44		1.01	14.1658	141.658			1.01	11.4792	114.792
1.02	11.7121	117.121		1.02	15.3113	153.113			1.02	12.5155	125.155
1.03	12.5957	125.957		1.03	16.4765	164.765			1.03	13.5698	135.698
1.04	13.4953	134.953		1.04	17.6612	176.612			1.04	14.6408	146.408
1.05	14.41	144.1		1.05	18.8615	188.615			1.05	15.7274	157.274
1.06	15.3397	153.397		1.06	20.0786	200.786			1.06	16.8295	168.295
1.07	16.2836	162.836		1.07	21.3104	213.104			1.07	17.9457	179.457
1.08	17.2422	172.422		1.08	22.556	225.56			1.08	19.0757	190.757
1.09	18.2007	182.007		1.09	23.8034	238.034			1.09	20.2062	202.062
1.1	19.1863	191.863		1.1	25.073	250.73			1.1	21.3604	213.604
